# Supplementary material for: Influence of the Al content on the in vitro bioactivity and biocompatibility of PVD Ti1−xAlxN coatings for orthopaedic applications
Source: Royal Society of Chemistry journal article supplement (doi:10.1039/c6ra08081b), 2016-01-01
Supplement: c6ra08081b1.pdf [file c6ra08081b1.pdf]

**Supporting Information**

**Influence of the Al content on the *in vitro* bioactivity and biocompatibility  
of PVD Ti<sub>1-x</sub>Al<sub>x</sub>N coatings for orthopedic applications**

*A. Esguerra-Arce*<sup>1</sup>

<sup>1</sup>Grupo de investigación en Tribología-Polímeros-Metalurgia de Polvos y Residuos Sólidos,  
TPMR, Universidad del Valle, Calle 13 No. 100-00, Cali, Colombia

*J. Esguerra-Arce*<sup>1</sup>

<sup>1</sup>Grupo de investigación en Tribología-Polímeros-Metalurgia de Polvos y Residuos Sólidos,  
TPMR, Universidad del Valle, Calle 13 No. 100-00, Cali, Colombia

*L. Yate*<sup>2</sup>

<sup>2</sup>Soft Material Nanotechnology, CIC biomaGUNE, Paseo Miramón 182, 20009 Donostia-  
San Sebastian, Spain

*C. Amaya*<sup>3</sup>

<sup>3</sup>GIDEMP, ASTIN-SENA, Calle 52 No.2 Bis-15, Cali, Colombia

*Emerson Coy*<sup>4</sup>

<sup>4</sup>NanoBioMedical Centre AMU, Adam Mickiewicz University, Umultowska 85A, 61-614  
Poznan, Poland

*Y. Aguilar*<sup>1</sup>

<sup>1</sup>TPMR, Universidad del Valle, Calle 13 No. 100-00, Cali, Colombia

*O. Gutiérrez*<sup>5</sup>

<sup>5</sup>Grupo de Farmacología, Universidad del Valle, Calle 4B No 36-00, Cali, Colombia

*S. Moya*<sup>2</sup>

<sup>2</sup>Soft Material Nanotechnology, CIC biomaGUNE, Paseo Miramón 182, 20009 Donostia-San Sebastian, Spain

**Corresponding author:**

Adriana Esguerra Arce

Grupo de investigación en Tribología-Polímeros-Metalurgia de polvos y Residuos sólidos,  
TPMR, Universidad del Valle

Calle 13 # 100 – 00

A.A. 25360

Cali Colombia

Phone: +57 2 3394610

Mail: [adriana.esguerra.arce@gmail.com](mailto:adriana.esguerra.arce@gmail.com)

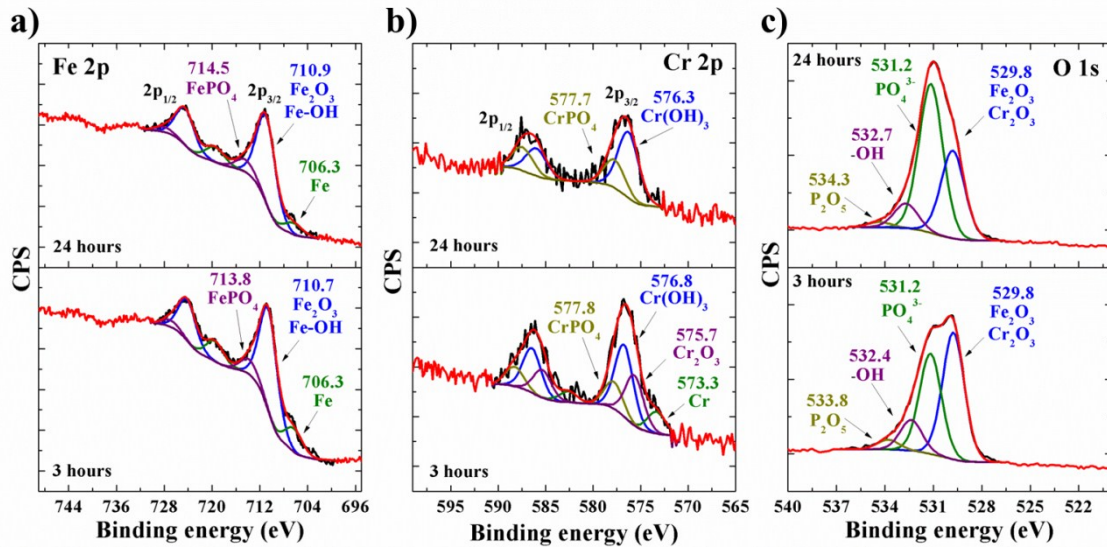

**Figure A** Fe 2p, Cr 2p and O 1s high resolution spectra of 304ss after 3 and 24 hours of exposure to SBF

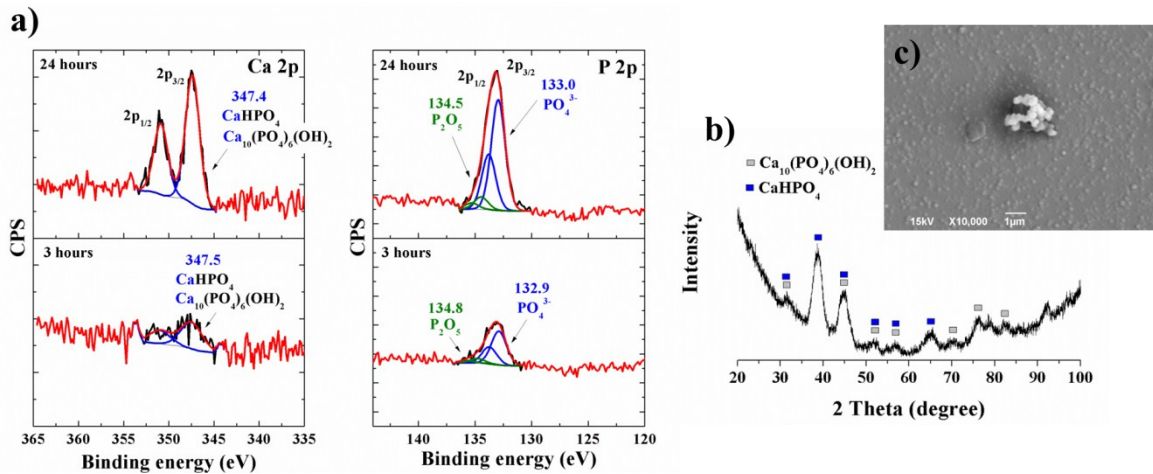

**Figure B** Ca y P 2p XPS high resolution spectra of 304ss after 3 and 24 hours of exposure to SBF (a), and diffractogram pattern (b) and SEM image (c) after 31 days of exposure to SBF

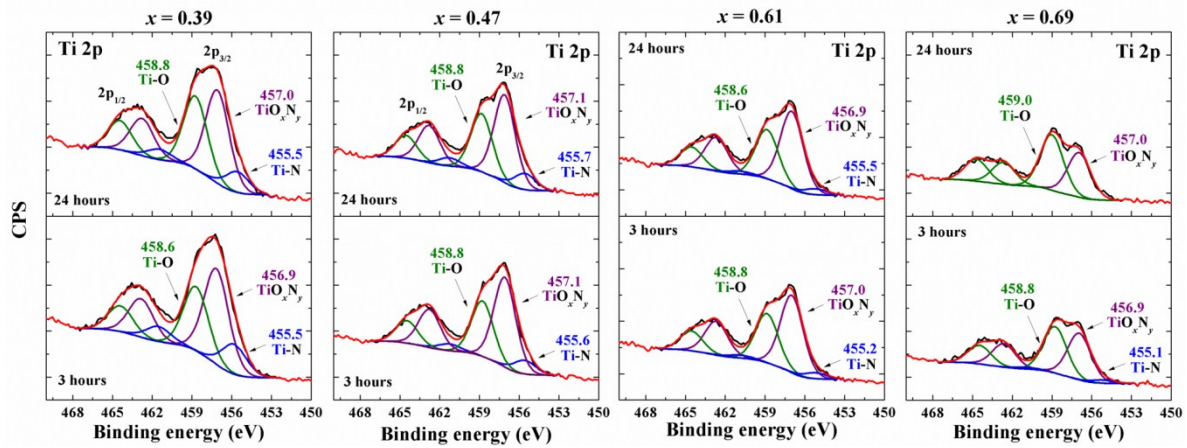

**Figure C** Ti 2p high resolution spectra of  $Ti_{1-x}Al_xN$  after 3 and 24 hours of exposure to SBF

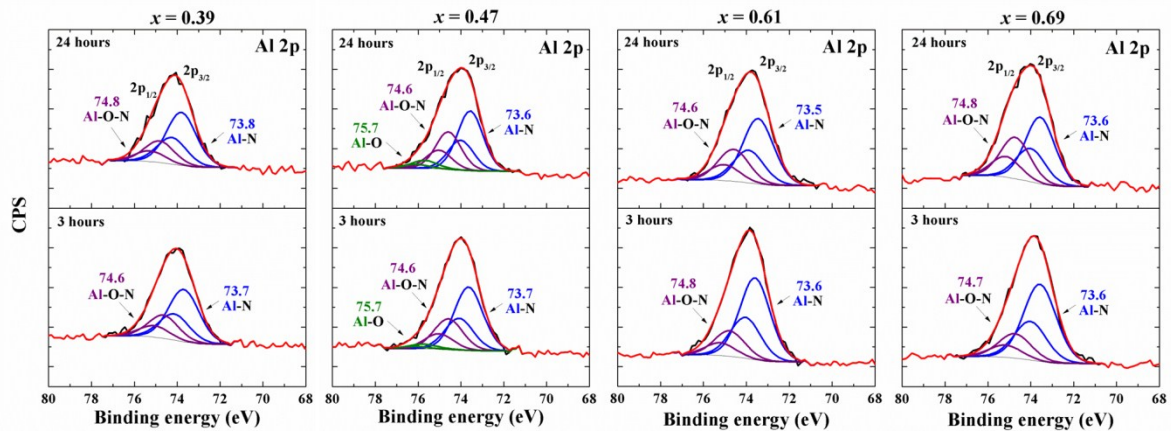

**Figure D** Al 2p high resolution spectra of  $Ti_{1-x}Al_xN$  after 3 and 24 hours of exposure to SBF
